# Supplementary material for: Direct synthesis of large-scale hierarchical MoS2 films nanostructured with orthogonally oriented vertically and horizontally aligned layers
Source: Royal Society of Chemistry journal article supplement (doi:10.1039/c5nr05938k), 2015-11-18
Supplement: c5nr05938k1.pdf [file c5nr05938k1.pdf]

Supporting Information

**Direct synthesis of large-scale hierarchical MoS<sub>2</sub> films nanostructured with orthogonally oriented vertically and horizontally aligned layers**

Xiaoyan Zhang<sup>1</sup>, Saifeng Zhang<sup>1</sup>, Bohua Chen<sup>2</sup>, Hao Wang<sup>2</sup>, Kan Wu<sup>2</sup>, Yang Chen<sup>3</sup>, Jintai Fan<sup>1</sup>, Shen Qi<sup>1</sup>, Xiaoli Cui<sup>3</sup>, Long Zhang<sup>1</sup>, and Jun Wang<sup>1,4\*</sup>

<sup>1</sup>Key Laboratory of Materials for High-Power Laser, Shanghai Institute of Optics and Fine Mechanics, Chinese Academy of Sciences, Shanghai 201800, China

<sup>2</sup>State Key Laboratory of Advanced Optical Communication Systems and Networks, Department of Electronic Engineering, Shanghai Jiao Tong University, Shanghai 200240, China

<sup>3</sup>Department of Materials Science, Fudan University, Shanghai 200433, China

<sup>4</sup>State Key Laboratory of High Field Laser Physics, Shanghai Institute of Optics and Fine Mechanics, Chinese Academy of Sciences, Shanghai 201800, China

**Figure S1**

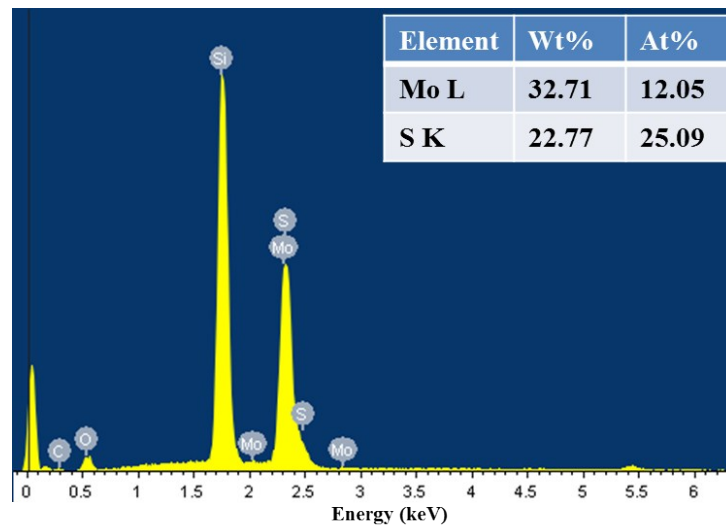

**Figure S1.** EDS spectrum of the hierarchical MoS<sub>2</sub> nanofilms, which gives a mole ratio of S:Mo of 2.08. The results are the same for both sides of the hierarchical MoS<sub>2</sub> nanofilms.

**Figure S2**

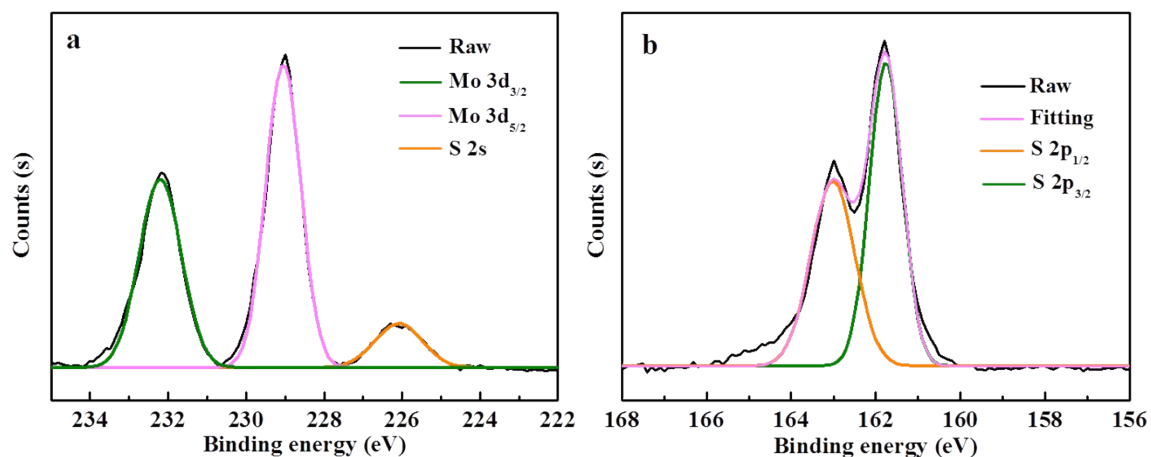

**Figure S2.** XPS of Mo 3d and (i) S 2p taken from the hierarchical MoS<sub>2</sub> thin films in the NMP-H<sub>2</sub>O systems. X-ray photoelectron spectroscopy (XPS) was conducted to analyze the chemical states of Mo and S in the MoS<sub>2</sub> sample. The Mo 3d XPS spectrum shows two sharp peaks at 229.0 and 232.2 eV, which can be indexed to doublet Mo 3d<sub>5/2</sub> and Mo 3d<sub>3/2</sub>, respectively. A small peak located at 226.0 eV is assigned to S 2s. The XPS spectrum of S 2p exhibits two peaks at 161.8 and 163.0 eV, corresponding to the S 2p<sub>3/2</sub> and S 2p<sub>1/2</sub> of divalent sulfide ions. The binding energies are consistent with the reported values for MoS<sub>2</sub> crystal.[1-3]

**Figure S3**

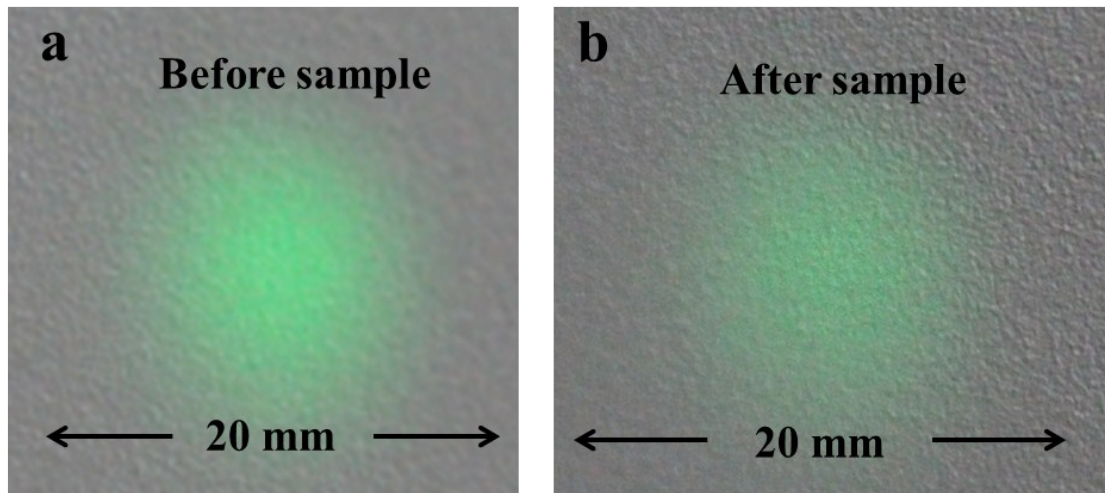

**Figure S3.** Photograph of a collimated beam (a) before and (b) after passing through the hierarchical MoS<sub>2</sub> thin films (532 nm, CW laser). No significant scattering or distortion is observed for the beam after it passes through the sample, demonstrating the high optical homogeneity of the hierarchical MoS<sub>2</sub> thin films.

**Figure S4**

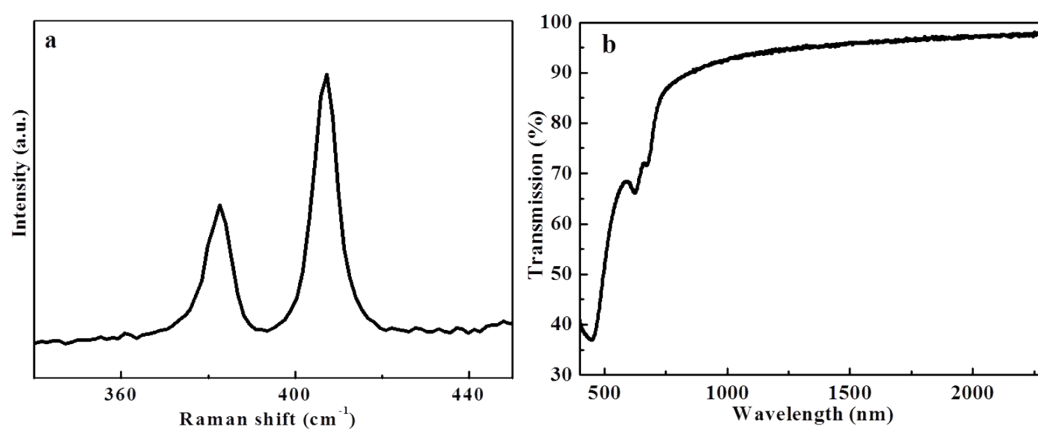

**Figure S4.** (a) Raman spectrum and (b) Transmission spectrum of the MoS<sub>2</sub> thin films nanostructured with only the horizontally aligned layers prepared with the solvothermal reaction time as 6 h.

**Figure S5**

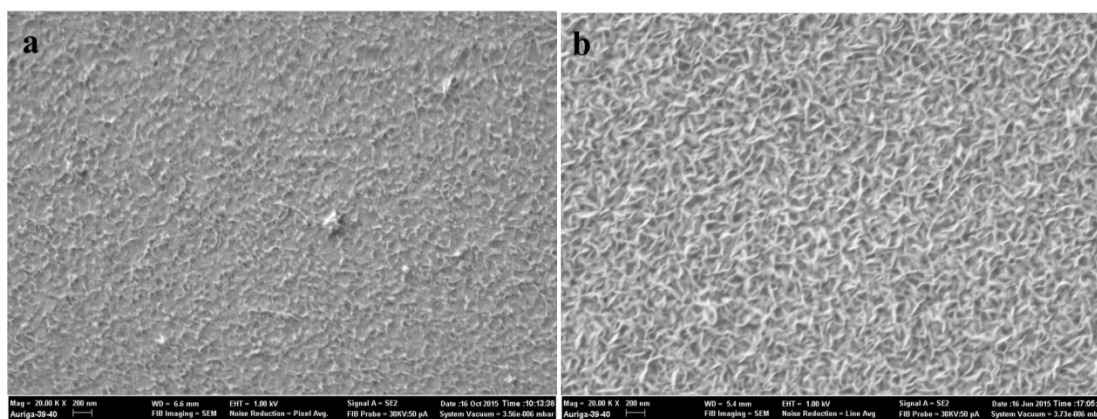

**Figure S5.** SEM images of the MoS<sub>2</sub> thin films obtained by tuning the solvothermal time to be (a) 8 h and (b) 12 h, respectively.

**Figure S6**

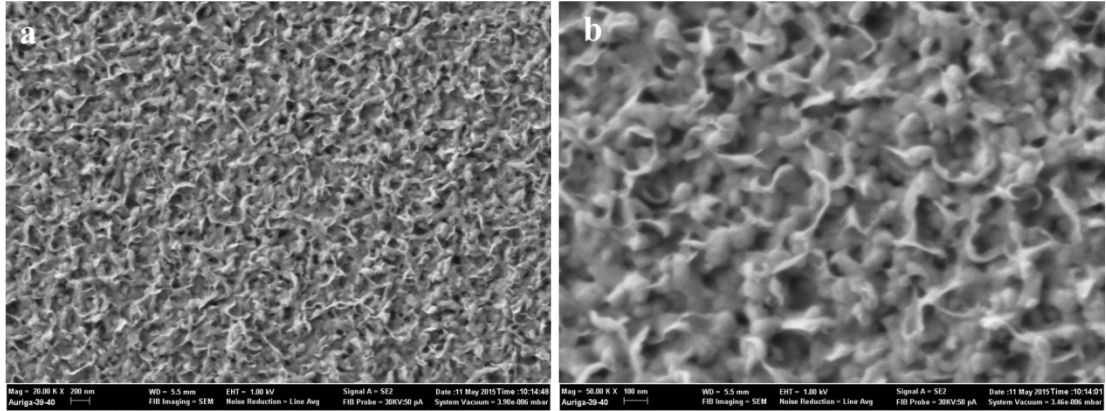

**Figure S6** SEM images of the MoS<sub>2</sub> thin films obtained by lowering the concentration of Mo precursor to 0.006 M. (a) Low magnification SEM image, (b) high magnification SEM image.

**Figure S7**

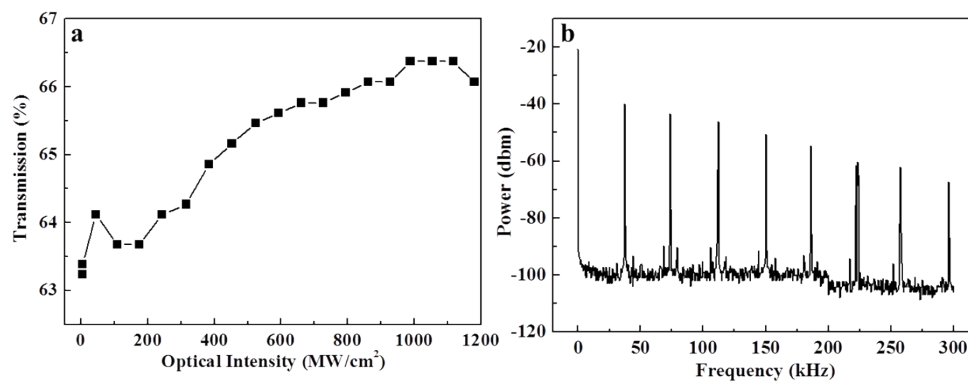

**Figure S7.** (a) Saturable absorption of the MoS<sub>2</sub>-PVA SA, (b) Wide span measurement of the RF spectrum.

**Table S1**

**Table S1** Linear and NLO parameters of the hierarchical MoS<sub>2</sub> thin films nanostructured with orthogonally oriented layers on quartz substrate with different laser propagation sequences with the film thickness as 160 nm.

| Laser propagation sequence | Laser           | $T$ (%) | $\alpha_0$ (cm <sup>-1</sup> ) | $\beta$ (cm GW <sup>-1</sup> ) | $I_s$ (GW cm <sup>-2</sup> ) |
|----------------------------|-----------------|---------|--------------------------------|--------------------------------|------------------------------|
| Back side                  | 1040 nm, 100 Hz | 65.0    | $2.6 \times 10^4$              | $-149 \pm 30$                  | $78 \pm 15$                  |
| Front side                 | 1040 nm, 100 Hz | 65.0    | $2.6 \times 10^4$              | $-223 \pm 30$                  | $57 \pm 15$                  |

Note:  $L$ , the film thickness with an error range of  $\pm 10$  nm;  $T$ , linear transmission at low input energy;  $\alpha_0$ , linear absorption coefficient;  $\beta$ , nonlinear absorption coefficient;  $I_s$ , saturation intensity.

**Table S2**

**Table S2** Passively Q-switching pulsed lasers in Er-doped fiber laser with few-layer MoS<sub>2</sub> and WS<sub>2</sub> SAs.

| Few-Layer MoS <sub>2</sub> Fabrication Method | Integration Platform | Layers in MoS <sub>2</sub> Flakes | $\lambda$ (nm) | Laser Properties |                  |          | Ref. |
|-----------------------------------------------|----------------------|-----------------------------------|----------------|------------------|------------------|----------|------|
|                                               |                      |                                   |                | $t$              | $f_{\text{rep}}$ | $P$ (mW) |      |
| SP-LPE (MoS <sub>2</sub> )                    | PVA composite        | 3-4                               | 1551           | 3.3 $\mu$ s      | 43.4 kHz         | 5.9      | [4]  |
|                                               | PVA composite        | ~3                                | 1565           | 5.4 $\mu$ s      | 27.0 kHz         | 1.7      | [5]  |
| CVD (MoS <sub>2</sub> )                       | Fiber facet          | 4-5                               | 1550           | 1.6 $\mu$ s      | 173 kHz          | 4.7      | [6]  |
| ME (MoS <sub>2</sub> )                        | Fiber facet          | 1-8                               | 1563           | 3.9 $\mu$ s      | 41 kHz           | 3.5      | [7]  |
| SP-LPE (MoS <sub>2</sub> )                    | Tapered fiber        | ~5                                | 1560           | 7.5 $\mu$ s      | /                | /        | [8]  |
| SP-LPE (MoS <sub>2</sub> )                    | PVA composite        | ~5                                | 1550           | 3.9 $\mu$ s      | 41 kHz           | 0.7      | [9]  |
| SP-LPE (WS <sub>2</sub> )                     | PVA composite        | ~5                                | 1550           | 9.9 $\mu$ s      | 78 kHz           | 5.5      | [9]  |
| SP-LPE (WS <sub>2</sub> )                     | PVA composite        | /                                 | 1563           | 0.71 $\mu$ s     | 134 kHz          | 2.5      | [10] |
| STG (MoS <sub>2</sub> )                       | PVA                  | 4-5                               | 1550           | 2.2 $\mu$ s      | 52 kHz           | 0.1      | Ours |

Note: Where ranges of parameters were reported for Q-switched lasers due to the power-dependent repetition rate and pulse duration, we quote the properties at the maximum power. SP-LPE, solution processed using liquid-phase exfoliation (LPE) method; ME, mechanical exfoliation; STG, solvothermal growth;  $\lambda$ , operating wavelength;  $t$ , minimum pulse duration;  $f_{\text{rep}}$ , highest pulse repetition rate;  $P$ , maximum average output power.

## References

- [1] K. K. Liu, W. Zhang, Y. H. Lee, Y. C. Lin, M. T. Chang, C. Y. Su, H. Li, Y. Shi, H. Zhang, C. S. Lai, L. J. Li, *Nano Lett.* **2012**, *12*, 1538.
- [2] C. Altavilla, M. Sarno, P. Ciambelli, *Chem. Mater.* **2011**, *23*, 3879.
- [3] C. N. R. Rao, A. Nag, *Eur. J. Inorg. Chem.* **2010**, *27*, 4244.
- [4] Y. Huang, Z. Q. Luo, Y. Y. Li, M. Zhong, B. Xu, K. J. Che, H. Y. Xu, Z. P. Cai, J. Peng, J. Weng. *Opt. Express* **2014**, *22*, 25258.
- [5] Z. Luo, Y. Huang, M. Zhong, Y. Li, J. Wu, B. Xu, H. Xu, Z. Cai, J. Peng, J. Weng. *J. Lightwave Technol.* **2014**, *32*, 4679.
- [6] H. Li, H. Xia, C. Lan, C. Li, X. Zhang, J. Li, Y. Liu. *IEEE Photon. Technol. Lett.* **2015**, *27*, 69.
- [7] R. Khazaeinezhad, S. H. Kassani, T. Nazari, H. Jeong, J. Kim, K. Choi, J. U. Lee, J. H. Kim, H. Cheong, D. I. Yeom. *Opt. Commun.* **2015**, *335*, 224.
- [8] H. Wang, B. H. Chen, X. Y. Zhang, S. Liu, B. Q. Zhu, J. Wang, K. Wu, J. P. Chen. *Photon. Res.* **2015**, *3*(3), A102.
- [9] B. H. Chen, X. Y. Zhang, K. Wu, H. Wang, J. Wang and J. P. Chen, *Opt. Express*, **2015**, *23*(20), 23723-26737.
- [10] S. H. Kassani, R. Khazaeinezhad, H. Jeong, T. Nazari, D.-I. Yeom, K. Oh. *Opt. Mater. Express* **2015**, *5*(2), 373.
